# Supplementary material for: Prebiotic-Induced Anti-tumor Immunity Attenuates Tumor Growth
Source: PubMed Central journal article supplement — Cell Rep. Author manuscript; Available in PMC 2020 Mar 3. (PMC7053418; doi:10.1016/j.celrep.2020.01.035), 2020-02-11
Supplement: NIHMS1560162-supplement-1.pdf [file NIHMS1560162-supplement-1.pdf]

**Cell Reports, Volume 30**

## **Supplemental Information**

### **Prebiotic-Induced Anti-tumor Immunity**

#### **Attenuates Tumor Growth**

**Yan Li, Lisa Elmén, Igor Segota, Yibo Xian, Roberto Tinoco, Yongmei Feng, Yu Fujita, Rafael R. Segura Muñoz, Robert Schmaltz, Linda M. Bradley, Amanda Ramer-Tait, Raphy Zarecki, Tao Long, Scott N. Peterson, and Ze'ev A. Ronai**

**a**

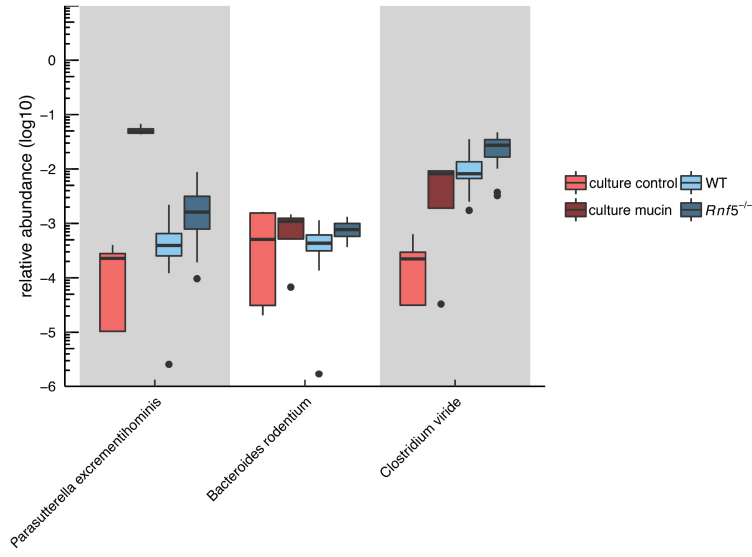

**b**

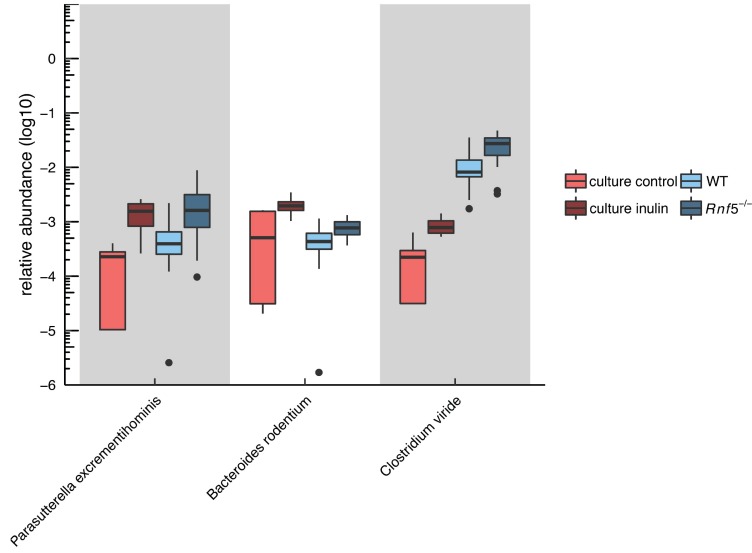

**c**

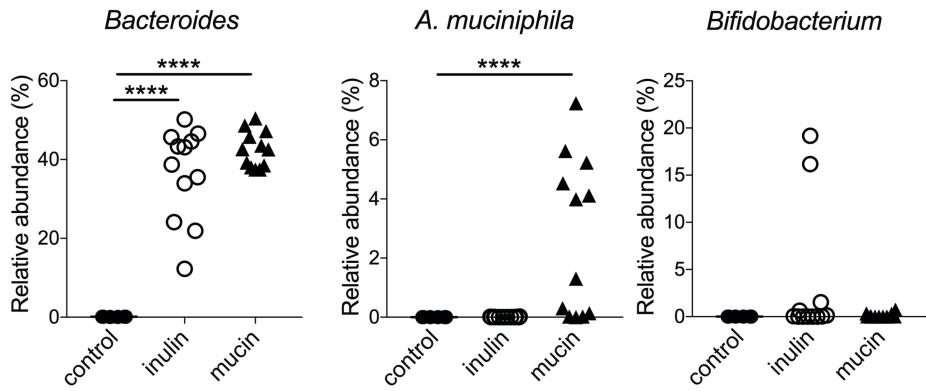

**Figure S1. Prebiotics that enrich for anti-tumor promoting taxa in vitro. Related to Figure 1.**

**a**, Boxplot of the relative abundance of the common taxa between the ones induced by mucin (1% w/v) in mouse fecal sample culture and the ones enriched in *Rnf5*<sup>-/-</sup> mouse gut microbiota (culture control n = 3; culture mucin n = 3 ; WT n = 30; *Rnf5*<sup>-/-</sup> n = 30 ). **b**, Boxplot of the relative abundance of the common taxa between the ones induced by inulin (1% w/v) in mouse fecal sample culture and the ones enriched in *Rnf5*<sup>-/-</sup> mouse gut microbiota (culture control n = 3; culture mucin n = 3; WT n = 30 ; *Rnf5*<sup>-/-</sup> n = 30). **c**, Fecal samples derived from 12 healthy human subjects cultivated in the presence or absence of 1% prebiotic (control n=6; mucin n=12; inulin n=12). 16S rDNA sequences corresponding to *Bifidobacterium*, *Bacteroides* and *Akkermansia muciniphila*. Data are one experiment (**a**, **b**) representative of two independent experiments (**c**). Graphs show the mean  $\pm$  s.e.m. \* $P < 0.05$ , \*\* $P < 0.005$ , \*\*\* $P < 0.001$ , \*\*\*\* $P < 0.0001$  by one-way ANOVA with Tukey's correction.

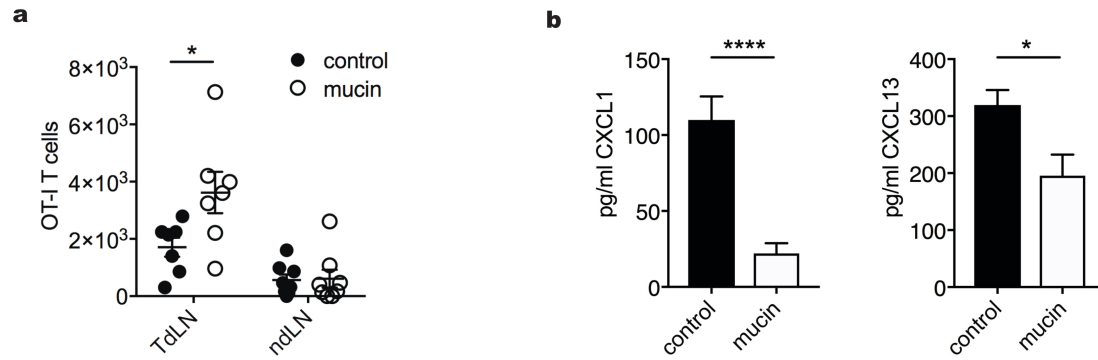

**Figure S2. Enhanced anti-tumor immune response in the mucin-treated mice. Related to Figure 2.**

**a**, Quantification of CD45.1<sup>+</sup> OT-I CD8<sup>+</sup> T cells in the tumor-draining lymph nodes (TdLN) and non-draining lymph nodes (ndLN) of WT C57BL/6 mice CD45.2<sup>+</sup> mice that were injected with B16-OVA melanoma cells (TdLN n = 7; ndLN n = 8). **b**, Serum chemokines in WT mice with or without mucin treatment at 10 days after tumor inoculation (n = 10). Data are representative of two independent experiments. Graphs show the mean  $\pm$  s.e.m. \* $P$  < 0.05, \*\* $P$  < 0.005, \*\*\* $P$  < 0.001, \*\*\*\* $P$  < 0.0001 by two-tailed  $t$ -test or Mann–Whitney  $U$  test.



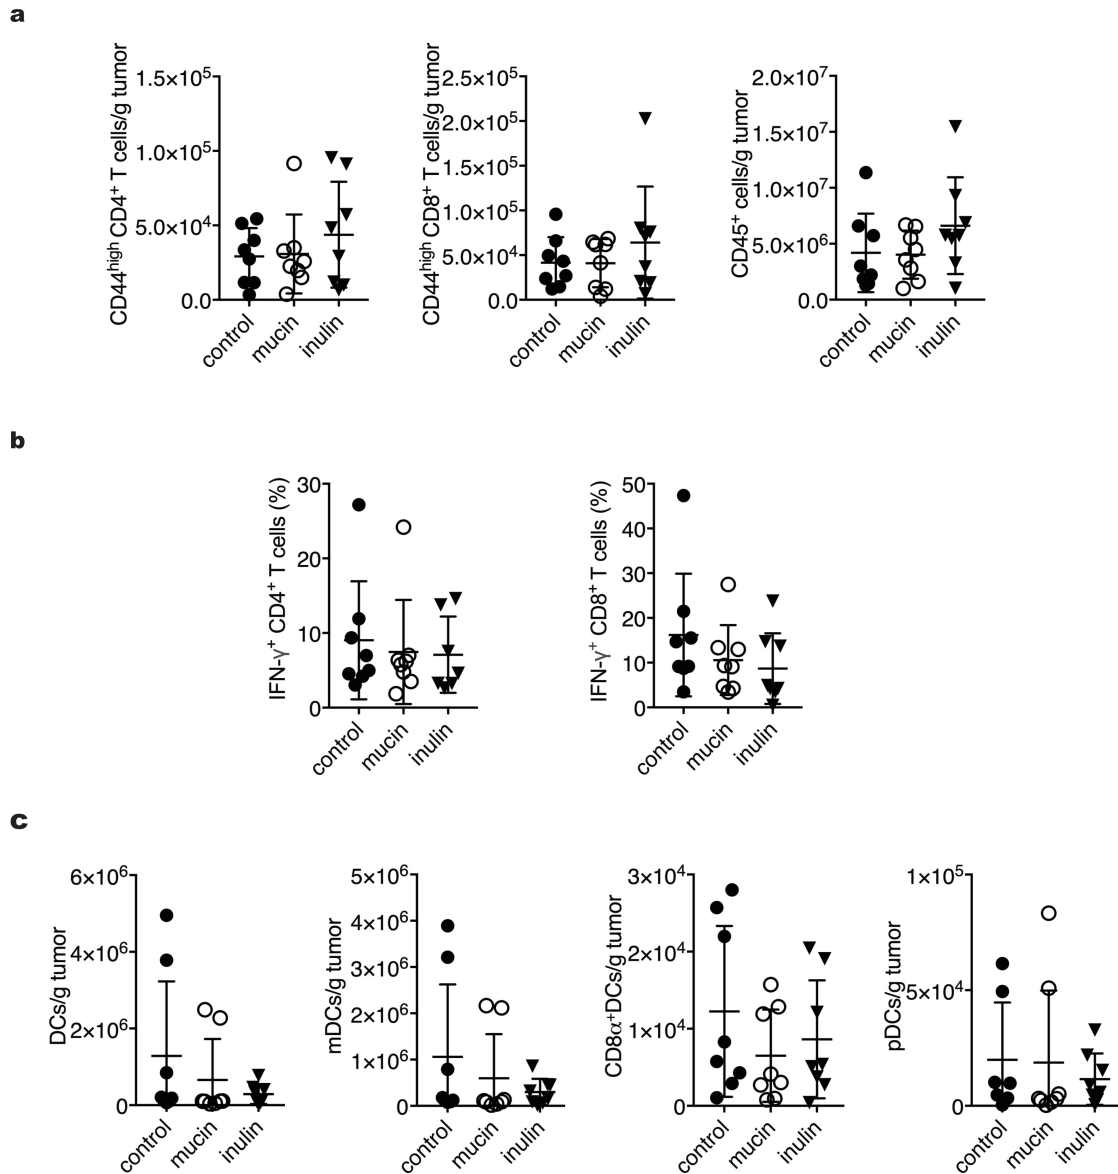

**Figure S3. TILs analysis of mucin or inulin-treated C57BL/6 mice injected MC-38 tumor. Related to Figure 4.**

**a**, Quantification of MC-38 tumor-infiltrating effector (CD44<sup>hi</sup>) CD4<sup>+</sup> and CD8<sup>+</sup> T cells and CD45<sup>+</sup> cells in mucin or inulin-treated C57BL/6 mice (n = 8); **b**, Quantification of MC-38 tumor-infiltrating IFN- $\gamma$ -producing CD4<sup>+</sup> and CD8<sup>+</sup> T cells in mucin or inulin-treated C57BL/6 mice (n = 8); **c** Quantification of MC-38 tumor-infiltrating total DCs and DC subsets in mucin or inulin-treated C57BL/6 mice (n = 8). Data are representative of two independent experiments. Graphs show the mean  $\pm$  s.e.m. \* $P < 0.05$ , \*\* $P < 0.005$ , \*\*\* $P < 0.001$ , \*\*\*\* $P < 0.0001$  by one-way ANOVA with Tukey's correction.

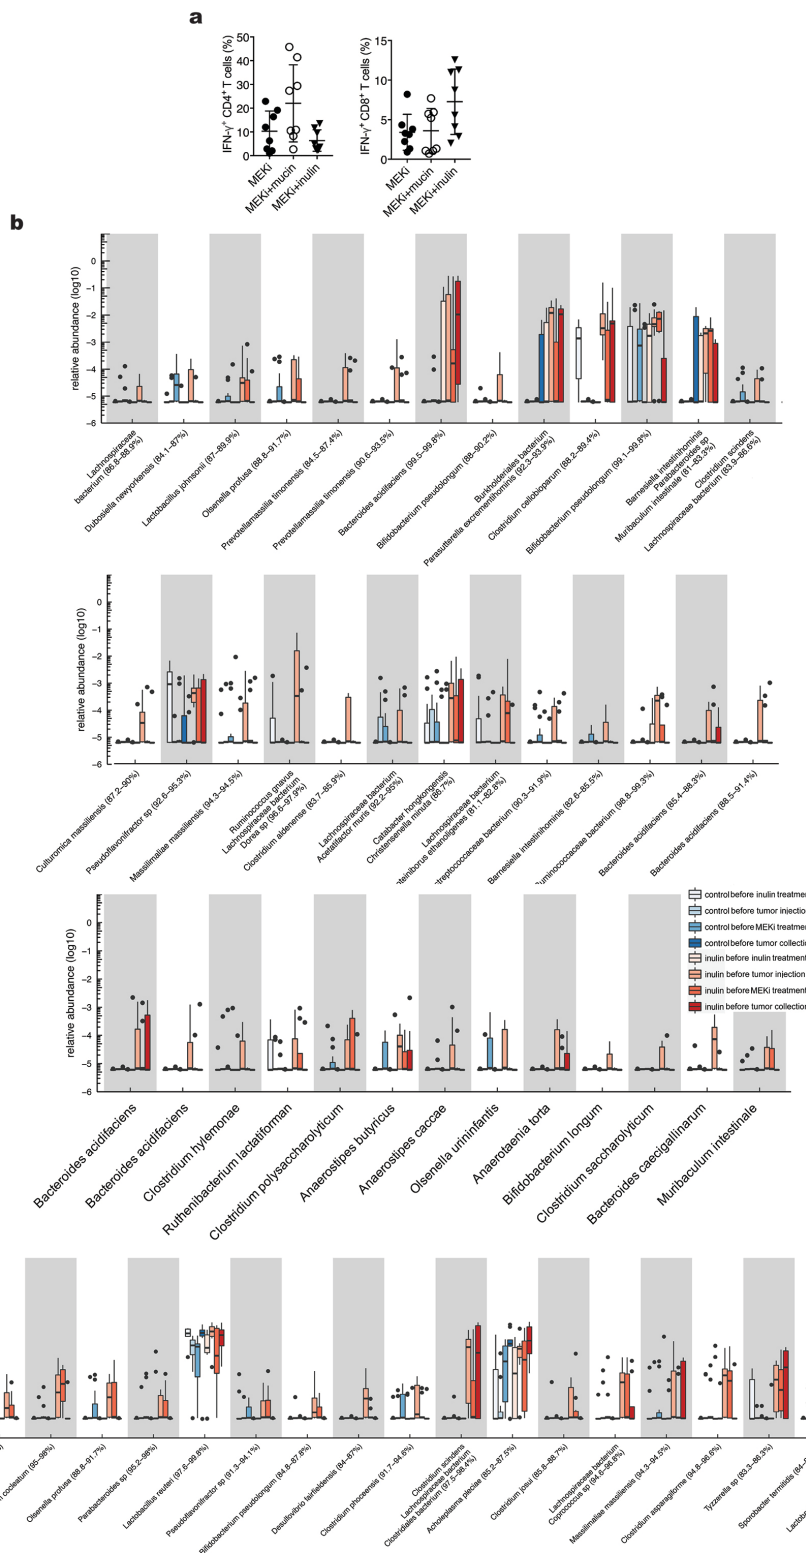

**Figure S4. Microbiome analysis of fecal samples from MEKi + prebiotics treated-mice. Related to Figure 5.**

**a**, Quantification of NRAS<sup>Q61K</sup> tumor-infiltrating IFN- $\gamma$ -producing CD4<sup>+</sup> and CD8<sup>+</sup> T cells from C57BL/6 mice treated with MEKi + mucin or inulin (n=8). **b**, Boxplot of the relative abundance of the taxa enriched in inulin treated-mice gut microbiota that are negatively correlated with tumor size (n = 10). The fecal samples were taken at different time points (before inulin treatment, before tumor injection, before MEKi treatment and before tumor collection). **c**, Boxplot of the relative abundance of the taxa enriched in gut microbiota of mucin treated-mice, which are negatively correlated with tumor size (n = 10). The fecal samples were taken at different time points (before mucin treatment, before tumor injection, before MEKi treatment and before tumor collection) following the inoculation of YUMM1.5 tumor cells. Data are representative of two independent experiments. Graphs show the mean  $\pm$  s.e.m. \* $P < 0.05$ , \*\* $P < 0.005$ , \*\*\* $P < 0.001$ , \*\*\*\* $P < 0.0001$  by one-way ANOVA with Tukey's correction.

**a**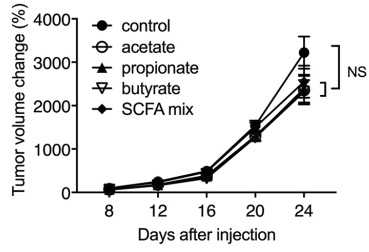**b**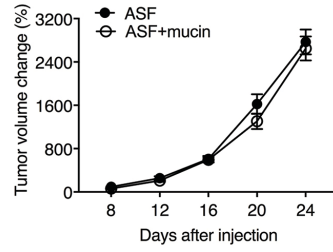**c**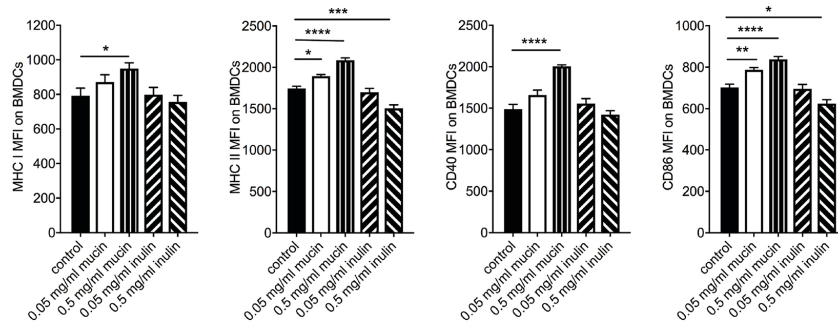**d**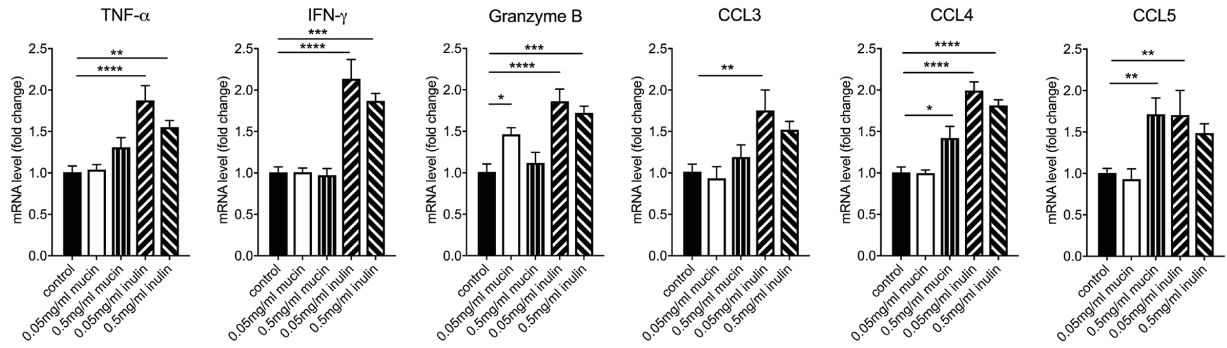**e**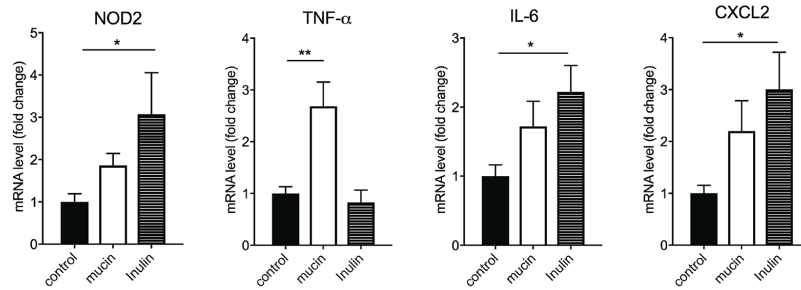

**Figure S5. Effect of mucin and inulin on the activation of DCs, T cells and IECs. Related to Figure 6.**

**a**, Growth of Yumml.5 tumors in C57BL/6 mice provided with butyrate, propionate and acetate (150 mM) and the combination of all three (50 mM each) in drinking water 14 days prior to and during tumor inoculation (n =12). **b**, SW1 tumor growth in ASF-bearing C3H/HeN mice undergoing oral gavage with or without mucin prior to tumor inoculation (n = 15). **c**, MHC I, MHC II, CD40 and CD86 expression (MFI) on BMDCs left untreated (control) or stimulated with 0.05 mg/ml and 0.5 mg/ml mucin and inulin in vitro (n = 6). **d**, qRT-PCR analysis of the indicated cytokine and chemokine mRNAs in CD8<sup>+</sup> T cells left untreated (control) or stimulated with 0.05 mg/ml and 0.5 mg/ml mucin and inulin in vitro (n = 4). **e**, qRT-PCR analysis of proinflammatory gene mRNA levels in IECs in mucin or inulin-treated mice (n = 6). Data are representative of two independent experiments. Graphs show the mean  $\pm$  s.e.m. \* $P < 0.05$ , \*\* $P < 0.005$ , \*\*\* $P < 0.001$ , \*\*\*\* $P < 0.0001$  by two-way ANOVA with Tukey's correction(**a** and **b**) or one-way ANOVA with Tukey's correction (**c**, **d** and **e**).

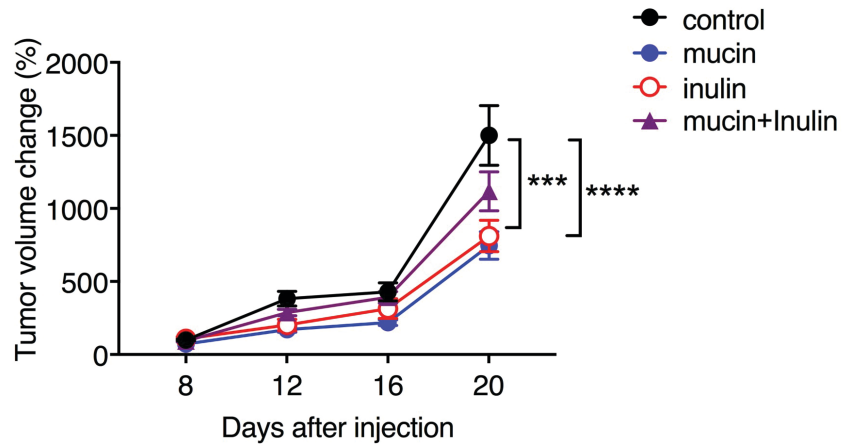

**Figure S6. Effect of mucin and inulin combination in C57BL/6 mice. Related to Figure 7.**

Growth of Yumml.5 mouse melanoma cells in C57BL/6 mice that were fed with 0 or 3% mucin in drinking water and (or) a diet enriched 15% inulin, starting 14 days prior to and during tumor inoculation (control n = 7; mucin n=5; inulin n=7; mucin+inulin n=8). Data are representative of two independent experiments. Graphs show the mean  $\pm$  s.e.m.

\* $P < 0.05$ , \*\* $P < 0.005$ , \*\*\* $P < 0.001$ , \*\*\*\* $P < 0.0001$  by two-way ANOVA with Tukey's correction.
